# Supplementary material
Source: HighWire-hosted journal article supplement (https://erj.ersjournals.com/content/suppl/2011/03/09/09031936.00137210)
Supplement: Suppl_table_990817.pdf [file Suppl_table_990817.pdf]

**Supplemental Materials**

**TABLE S1 The association between incense burning at home and GSTM1 genotype on subcategories of asthma and wheeze**

|                           | No incense<br>GSTM1<br>present | No incense<br>GSTM1 null |             | With incense<br>GSTM1 present |             | With incense<br>GSTM1 null |             |
|---------------------------|--------------------------------|--------------------------|-------------|-------------------------------|-------------|----------------------------|-------------|
|                           |                                | OR                       | 95%CI       | OR                            | 95%CI       | OR                         | 95%CI       |
| Univariate model          |                                |                          |             |                               |             |                            |             |
| Asthma                    |                                |                          |             |                               |             |                            |             |
| Lifetime asthma           | 1.00                           | 0.75                     | (0.51,1.10) | 0.80                          | (0.56,1.15) | 0.80                       | (0.56,1.12) |
| Current asthma            | 1.00                           | 0.79                     | (0.44,1.40) | 0.97                          | (0.57,1.65) | 0.98                       | (0.59,1.62) |
| Medication use            | 1.00                           | 0.72                     | (0.35,1.49) | 1.15                          | (0.61,2.15) | 1.05                       | (0.57,1.95) |
| Wheeze                    |                                |                          |             |                               |             |                            |             |
| Lifetime wheeze           | 1.00                           | 0.87                     | (0.63,1.20) | 0.86                          | (0.63,1.17) | 0.90                       | (0.67,1.20) |
| Current wheeze            | 1.00                           | 0.75                     | (0.44,1.26) | 0.79                          | (0.48,1.28) | 0.78                       | (0.49,1.25) |
| Nocturnal wheeze          | 1.00                           | 0.67                     | (0.31,1.45) | 1.14                          | (0.59,2.19) | 0.90                       | (0.47,1.73) |
| Exercise wheeze           | 1.00                           | 1.23                     | (0.72,2.11) | 1.92                          | (1.18,3.14) | 1.51                       | (0.92,2.45) |
| Mutually adjusted model * |                                |                          |             |                               |             |                            |             |
| Asthma                    |                                |                          |             |                               |             |                            |             |
| Lifetime asthma           | 1.00                           | 0.69                     | (0.46,1.03) | 0.85                          | (0.58,1.25) | 0.86                       | (0.60,1.23) |
| Current asthma            | 1.00                           | 0.70                     | (0.38,1.27) | 1.08                          | (0.63,1.88) | 1.14                       | (0.67,1.94) |
| Medication use            | 1.00                           | 0.69                     | (0.33,1.46) | 1.28                          | (0.66,2.46) | 1.22                       | (0.64,2.32) |
| Wheeze                    |                                |                          |             |                               |             |                            |             |

|                  |      |      |             |      |             |      |             |
|------------------|------|------|-------------|------|-------------|------|-------------|
| Lifetime wheeze  | 1.00 | 0.85 | (0.61,1.18) | 0.97 | (0.70,1.33) | 1.03 | (0.76,1.40) |
| Current wheeze   | 1.00 | 0.71 | (0.41,1.22) | 0.84 | (0.50,1.41) | 0.92 | (0.56,1.50) |
| Nocturnal wheeze | 1.00 | 0.60 | (0.27,1.33) | 1.12 | (0.57,2.20) | 0.91 | (0.47,1.79) |
| Exercise wheeze  | 1.00 | 1.14 | (0.66,1.98) | 1.96 | (1.18,3.26) | 1.63 | (0.98,2.69) |

---

\*Models are adjusted for age, sex, parental education, parental asthma, parental atopy, gestational age, city, maternal smoking during pregnancy and lifetime ETS at home.

**TABLE S2 The association between incense burning at home and GSTP1 genotype on subcategories of asthma and wheeze**

|                           | No incense    |                          | With incense  |                          | No incense    |                          | With incense  |                          |
|---------------------------|---------------|--------------------------|---------------|--------------------------|---------------|--------------------------|---------------|--------------------------|
|                           | GSTP1 Ile-Ile | GSTP1 Ile-Val or Val-Val |
|                           | OR            | 95%CI                    | OR            | 95%CI                    | OR            | 95%CI                    | OR            | 95%CI                    |
| Univariate model          |               |                          |               |                          |               |                          |               |                          |
| Asthma                    |               |                          |               |                          |               |                          |               |                          |
| Lifetime asthma           | 1.00          | 0.87 (0.58,1.30)         | 0.85          | (0.63,1.16)              | 0.95          | (0.67,1.35)              |               |                          |
| Current asthma            | 1.00          | 0.78 (0.42,1.45)         | 0.94          | (0.60,1.46)              | 1.20          | (0.74,1.96)              |               |                          |
| Medication use            | 1.00          | 0.74 (0.33,1.62)         | 1.07          | (0.63,1.83)              | 1.39          | (0.77,2.50)              |               |                          |
| Wheeze                    |               |                          |               |                          |               |                          |               |                          |
| Lifetime wheeze           | 1.00          | 1.07 (0.77,1.49)         | 0.97          | (0.75,1.25)              | 1.00          | (0.74,1.34)              |               |                          |
| Current wheeze            | 1.00          | 0.82 (0.47,1.43)         | 0.86          | (0.57,1.29)              | 0.87          | (0.53,1.41)              |               |                          |
| Nocturnal wheeze          | 1.00          | 0.73 (0.32,1.67)         | 1.18          | (0.68,2.06)              | 0.98          | (0.50,1.91)              |               |                          |
| Exercise wheeze           | 1.00          | 0.81 (0.47,1.42)         | 1.42          | (0.98,2.08)              | 1.30          | (0.84,2.01)              |               |                          |
| Mutually adjusted model * |               |                          |               |                          |               |                          |               |                          |
| Asthma                    |               |                          |               |                          |               |                          |               |                          |
| Lifetime asthma           | 1.00          | 0.88 (0.58,1.34)         | 0.99          | (0.71,1.36)              | 1.03          | (0.71,1.50)              |               |                          |
| Current asthma            | 1.00          | 0.77 (0.40,1.47)         | 1.16          | (0.73,1.86)              | 1.40          | (0.83,2.35)              |               |                          |
| Medication use            | 1.00          | 0.67 (0.30,1.52)         | 1.24          | (0.70,2.18)              | 1.50          | (0.80,2.78)              |               |                          |
| Wheeze                    |               |                          |               |                          |               |                          |               |                          |

|                  |      |      |             |      |             |      |             |
|------------------|------|------|-------------|------|-------------|------|-------------|
| Lifetime wheeze  | 1.00 | 1.13 | (0.80,1.60) | 1.17 | (0.89,1.53) | 1.13 | (0.82,1.55) |
| Current wheeze   | 1.00 | 0.87 | (0.49,1.56) | 1.04 | (0.67,1.61) | 0.97 | (0.58,1.62) |
| Nocturnal wheeze | 1.00 | 0.73 | (0.31,1.72) | 1.26 | (0.70,2.28) | 1.01 | (0.50,2.05) |
| Exercise wheeze  | 1.00 | 0.75 | (0.42,1.34) | 1.54 | (1.04,2.30) | 1.37 | (0.87,2.17) |

---

\*Models are adjusted for age, sex, parental education, parental asthma, parental atopy, gestational age, city, maternal smoking during pregnancy and lifetime ETS at home.
